# Supplementary material for: Technical note: Measurements of fluorescent dissolved organic matter (FDOM) in seawater (Filter blanks, pore sizes, and storage)
Source: Copernicus journal article supplement (doi:10.5194/egusphere-2025-501), 2025-02-25
Supplement: Supplementary file [file egusphere-2025-501-RC1-supplement.pdf]

## General comments

This study examines the influence of filter blanks, pore sizes, and storage conditions on fluorescent dissolved organic matter (FDOM) measurements in seawater. Given the importance of FDOM as a tracer in oceanographic research, ensuring the accuracy and consistency of its measurements across different sampling protocols is critical. The manuscript presents clear objectives and a thorough discussion of the findings.

The study's primary objective is to refine methodologies for more reliable FDOM measurements. To achieve this, the researchers evaluated uncertainties associated with various sample preparation techniques. Using parallel factor analysis (PARAFAC), they identified three key FDOM components: the terrestrial humic-like peak (C peak), the marine humic-like peak (M peak), and the protein-like peak (T peak).

The main findings of the study are as follows:

1. **Effect of blanks:** Systematic blank values were observed when samples were filtered through pre-combusted glass fiber filters (0.7  $\mu\text{m}$  pore size) and membrane filters (0.2  $\mu\text{m}$  pore size) without pre-cleaning. This indicates that the filtration process can introduce contamination that affects FDOM measurements.
2. **Effect of pre-washing:** The blank values became negligible when the filters were pre-washed with 5 mL of 0.1 M HCl or 20 mL of distilled water, suggesting that proper pre-treatment of filters is essential for accurate measurements.
3. **Effect of storage:** FDOM<sup>H</sup> concentrations remained consistent for 21 days when stored in a refrigerator or freezer. However, the T peak concentrations showed significant decreases within five days, indicating that protein-like components are more susceptible to degradation.

I recognize the effort put into this study and the importance of the findings. However, I disagree with one recommendation made in the manuscript that can potentially have important impacts. In the discussion, the authors state:

*the filtration procedure is not necessary for measuring FDOM concentrations in open ocean waters*

This statement seems counterintuitive, as filtration is a standard practice in oceanographic research to remove particulate matter and ensure sample homogeneity.

- First, you never know what you might find in a sample and it might be too late when you figure out that you should have filtered it.
- Second, based on Figure 3, filtering appears to have a significant effect on the T component. From the data provided in the appendix, I extracted the T peak concentrations for different storage conditions and measurement days (0, 5, and 21 days). The boxplot below illustrates that the T peak concentrations for unfiltered samples can be significantly higher than those for filtered samples. Therefore, I would advise caution in recommending against filtering samples.

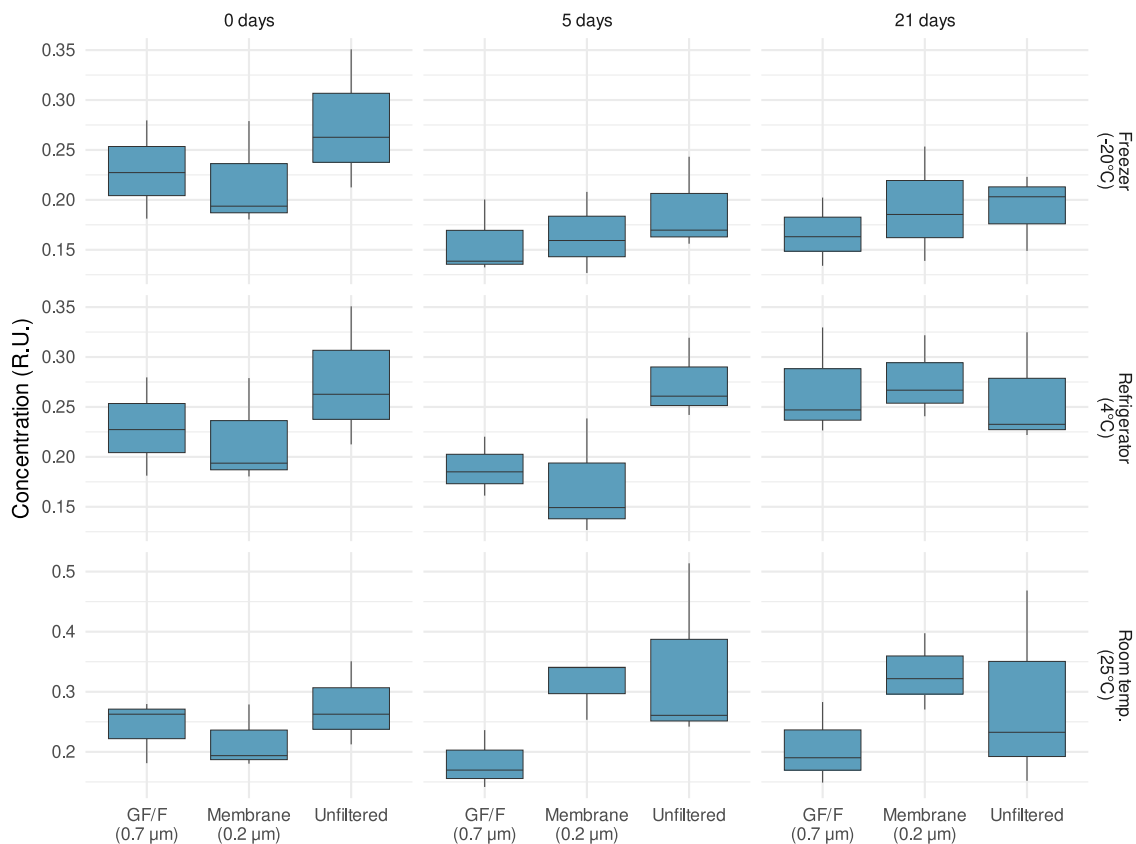

Figure 1: Boxplot of T peak concentrations for different storage conditions and measurement days.

I also wonder if there are many researchers that do not filter their samples. I would suggest discussing this point further and providing more context on the implications of not filtering samples in oceanographic research.

## Specific comments

### Abstract

- Line 13: *the samples identified three...*: the samples cannot identify, the researchers or the statistics identified.
- Line 14: what is a *high procedural blank*? This should be rephrased for clarity. Maybe something like *high blank values*.
- Line 18: Define the H in FDOM<sup>H</sup>. I guess this means humic-like, but it should be spelled out the first time.
- Line 21: It is said that significant bacterial degradation occurs after five days, but later in the same sentence it is said three days. Please clarify.

## Introduction

- Line 33: I suggest removing the last sentence.

## Methods

- Authors used 1 cm quartz cuvettes for the measurements. It seems a bit unusual to use so small pathlength cuvettes for samples from the open ocean. Could you provide more details on this choice?
- Line 59: It is specified that the deepest samples were measured at 500 meters, but in Fig. 4, we can see 2300 meters. Please clarify.
- Line 86: Maybe rephrase the sentence to be precise that the components were compared to the components found in the OpenFluor database.
- Line 95: The term *the filter blank* is often used. I would suggest replacing it with something like *the fluorescence of the C/M/T peaks measured on the filtrate*, or something similar.

## Results

- The authors report some statistical results in the text, but they do not specify which tests were used.
- Figure 3:
  - Why is there a second y-axis on the right side of the plot? It is confusing and unnecessary. Both unfiltered and filtered samples should be on the same y-axis (they already are on the same scale).
  - Add the legend for the circle and triangle markers in the legend.
  - Add a tag/annotation on each subplot to identify them in the text.

## Discussion

- Line 133: I suggest replacing *in the course of water filtration* with *by the filtration process*.
- Line 157: I think you meant Fig. 4.

- Line 158: The authors say *However, at room temperature, we observed significant changes in FDOMH concentrations after five days*. However, I do not see many changes in the figure for peaks C and M. Do you mean the T peak?

## **Conclusions**

In the conclusions and elsewhere, the authors suggest that the decision to filter or not should depend on the research question—specifically, whether the T peak is of interest. Could the authors clarify what types of research questions would not require consideration of the T peak? Providing a few examples would be valuable.

## **Other comments**

- The samples come from different areas with varying salinity. Can this influence fluorescence intensity?
- Please identify each panel in the figures and cite them properly in the text when discussing them.
